# Supplementary material
Source: HighWire-hosted journal article supplement (https://bmjopenquality.bmj.com/content/10/3/e001509)
Supplement: inline-supplementary-material-2 [file inline-supplementary-material-2.pdf]

**Abstract 2: Top 5 medications used, by sex, age group and medication class, household population aged 25 to 79, Canada, 2007 to 2011**

| Men                                                                |                     |                         |      |      | Women                                                              |             |                         |      |      |
|--------------------------------------------------------------------|---------------------|-------------------------|------|------|--------------------------------------------------------------------|-------------|-------------------------|------|------|
|                                                                    |                     | Prevalence              |      |      |                                                                    |             | Prevalence              |      |      |
|                                                                    |                     | 95% Confidence Interval |      |      |                                                                    |             | 95% Confidence Interval |      |      |
| Age group, medication class                                        | Number '000         | %                       | from | to   | Age group, medication class                                        | Number '000 | %                       | from | to   |
| <b>Total 25 to 79</b>                                              |                     |                         |      |      | <b>25 to 79</b>                                                    |             |                         |      |      |
| Lipid-modifying agents, plain                                      | 1,697.6             | 15.9*                   | 14.0 | 17.7 | Anti-depressants                                                   | 1,514.0     | 13.7*                   | 11.3 | 16.1 |
| Ace inhibitors, plain                                              | 978.1               | 9.1*                    | 7.6  | 10.7 | Lipid-modifying agents, plain                                      | 1,205.2     | 10.9                    | 9.3  | 12.5 |
| Drugs for peptic ulcer and gastro-esophageal reflux disease (GERD) | 836.3               | 7.8                     | 6.1  | 9.5  | Thyroid                                                            | 1,082.5     | 9.8*                    | 8.3  | 11.3 |
| Beta-blocking agents                                               | 730.3               | 6.8*                    | 5.6  | 8.1  | Drugs for peptic ulcer and gastro-esophageal reflux disease (GERD) | 1,011.8     | 9.2                     | 7.5  | 10.8 |
| Other analgesics and anti-pyretics                                 | 677.7               | 6.3*                    | 5.4  | 7.3  | ACE inhibitors, plain                                              | 659.6       | 6.0                     | 4.9  | 7.1  |
| <b>25 to 44</b>                                                    |                     |                         |      |      | <b>25 to 44</b>                                                    |             |                         |      |      |
| Anti-depressants                                                   | 190.8 <sup>E</sup>  | 4.2*                    | 2.4  | 6.0  | Systemic us6.0e hormonal contraceptives                            | 513.1       | 11.4*                   | 8.5  | 14.3 |
| Drugs for peptic ulcer and gastro-esophageal reflux disease (GERD) | 163.9 <sup>E</sup>  | 3.6                     | 1.9  | 5.4  | Anti-depressants                                                   | 415.2       | 9.3 <sup>E</sup>        | 6.0  | 12.5 |
| Adrenergics, inhalants                                             | 89.9 <sup>E</sup>   | 2.0                     | 0.8  | 3.2  | Thyroid                                                            | 194.5       | 4.3* <sup>E</sup>       | 2.6  | 6.1  |
| Lipid-modifying agents, plain                                      | <149.2 <sup>T</sup> | <3.3 <sup>T</sup>       | ...  | ...  | Drugs for peptic ulcer and gastro-esophageal                       | 119.1       | 2.7 <sup>E</sup>        | 1.4  | 3.9  |

|                                                                    |                    |       |      |      |                                                                    |       |                  |      |      |
|--------------------------------------------------------------------|--------------------|-------|------|------|--------------------------------------------------------------------|-------|------------------|------|------|
|                                                                    |                    |       |      |      | reflux disease (GERD)                                              |       |                  |      |      |
| ACE inhibitors, plain                                              | 77.1 <sup>E</sup>  | 1.7*  | 0.9  | 2.5  | Adrenergics, inhalants                                             | 105.3 | 2.3 <sup>E</sup> | 1.5  | 3.2  |
| <b>45 to 64</b>                                                    |                    |       |      |      | <b>45 to 64</b>                                                    |       |                  |      |      |
| Lipid-modifying agents, plain                                      | 877.0              | 18.9* | 15.7 | 22.0 | Anti-depressants                                                   | 846.4 | 17.2*            | 14.3 | 20.2 |
| Ace inhibitors, plain                                              | 477.7              | 10.3* | 7.8  | 12.7 | Lipid-modifying agents, plain                                      | 563.9 | 11.5             | 8.8  | 14.2 |
| Drugs for peptic ulcer and gastro-esophageal reflux disease (GERD) | 421.7 <sup>E</sup> | 9.1   | 5.9  | 12.2 | Thyroid                                                            | 536.7 | 10.9*            | 8.5  | 13.4 |
| Anti-depressants                                                   | 381.9              | 8.2   | 5.6  | 10.9 | Drugs for peptic ulcer and gastro-esophageal reflux disease (GERD) | 522.2 | 10.6             | 8.0  | 13.2 |
| Other analgesics and anti-pyretics                                 | 364.7              | 7.8*  | 6.1  | 9.6  | Estrogens                                                          | 325.9 | 6.6*             | 4.9  | 8.4  |
| <b>65 to 79</b>                                                    |                    |       |      |      | <b>65 to 79</b>                                                    |       |                  |      |      |
| Lipid-modifying agents, plain                                      | 738.7              | 47.9* | 42.0 | 53.7 | Lipid-modifying agents, plain                                      | 584.7 | 35.6             | 30.6 | 40.6 |
| ACE inhibitors, plain                                              | 422.7              | 27.4* | 21.5 | 33.3 | Drugs for peptic ulcer and gastro-esophageal reflux disease (GERD) | 370.4 | 22.5             | 17.6 | 27.4 |
| Beta-blocking agents                                               | 359.7              | 23.3* | 17.8 | 28.9 | Thyroid                                                            | 351.2 | 21.4*            | 16.9 | 25.8 |
| Other analgesics and anti-pyretics                                 | 281.7              | 18.3  | 14.5 | 22.0 | ACE inhibitors, plain                                              | 304.9 | 18.5             | 14.4 | 22.7 |
| Drugs for peptic ulcer and gastro-esophageal reflux disease (GERD) | 250.7              | 16.3  | 11.5 | 21.0 | Beta-blocking agents                                               | 275.3 | 16.7             | 12.7 | 20.8 |

\* Significantly different from estimate for opposite sex (p<0.5)

<sup>T</sup> if coefficient of variation exceeds 33.3%, but cell contains at least 10 records, estimate is indicated as being less than upper limit of 95% confidence interval

<sup>E</sup> use with caution

... not applicable

**Note:** Respondents taking more than one drug in medication class are reflected in that class only once.

**Source:** 2007 to 2009 and 2009 to 2011 Canadian Health Measures Survey, combined.
